## P1681

# Clinical profile of patients initiating evolocumab in Spanish Cardiology Units: A RETrospective, Observational Study of Real-World Clinical Practice (RETOSS-Cardio)

V. Barrios<sup>1</sup>, M.I. Antorrena Miranda<sup>2</sup>, C. Bonanad Lozano<sup>3</sup>, J. Cosin Sales<sup>4</sup>, O. Diaz De Castro<sup>5</sup>, M.R. Fernandez Del Olmo<sup>6</sup>, A. Garcia Del Egado<sup>7</sup>, D. Garcia Fuertes<sup>8</sup>, E. Garcia Izquierdo<sup>9</sup>, M. Mera Romero<sup>10</sup>, E. Otero Chulian<sup>11</sup>, L.M. Rincon Diaz<sup>1</sup>, R. Vazquez Garcia<sup>12</sup>, C. Roldan Suarez<sup>13</sup>, V. Arrarte Esteban<sup>14</sup>

<sup>1</sup>University Hospital Ramon y Cajal de Madrid, Madrid, Spain; <sup>2</sup>University Hospital La Paz, Madrid, Spain; <sup>3</sup>University Hospital Clinic of Valencia, Valencia, Spain; <sup>4</sup>Hospital Arnau de Vilanova, Lleida, Spain; <sup>5</sup>Complejo Hospitalario de Pontevedra, Pontevedra, Spain; <sup>6</sup>Complejo Hospitalario de Jaen, Jaen, Spain; <sup>7</sup>Hospital of Leon, Leon, Spain; <sup>8</sup>Hospital Santa Barbara, Puertollano, Spain; <sup>9</sup>University Hospital Puerta de Hierro Majadahonda, Madrid, Spain; <sup>10</sup>Hospital Virgen de la Luz, Cuenca, Spain; <sup>11</sup>Hospital Universitario de Jerez, Cadiz, Spain; <sup>12</sup>University Hospital Puerta del Mar, Cadiz, Spain; <sup>13</sup>Amgen Spain, Barcelona, Spain; <sup>14</sup>General University Hospital of Alicante, Alicante, Spain

**Funding Acknowledgement:** This work was supported by Amgen.

**Background/Introduction:** Cardiovascular (CV) disease represents the leading cause of death and disability in developed countries with elevated LDL-C among the main risk factors for CV events.

**Purpose:** We conducted a study to describe the clinical profile of patients initiating evolocumab in real-world clinical practice, specifically hospital cardiology units in Spain.

**Methods:** Retrospective, observational, serial chart review of consecutive hyperlipidemic patients ( $\geq 18$  years) who initiated evolocumab in 31 Spanish hospital cardiology units from February-2016 to May-2017. Relevant patients characteristics and clinical data were collected from medical records at 12 weeks pre- and 12 $\pm$ 4 weeks post-evolocumab initiation. Baseline values correspond to data collected up to 12 weeks prior to initiation of evolocumab.

**Results:** 186 patients were enrolled: 72.0% men, mean (SD) age 60.3 (9.8) years, mean (SD) body mass index 28.5 (4.3) kg/m<sup>2</sup>. CV history and CV risk factors at evolocumab initiation are summarised below (Figure). Half of all patients were statin intolerant and almost all (94.1%) were secondary prevention. At baseline, half (51.1%) of all patients were receiving

ezetimibe and 44.1% were receiving high-intensity statins. At baseline, mean (SD) LDL-C was 144.0 (49.0) mg/dL; 38.7% of patients had LDL-C 100-<130 mg/dL, 28.0% had LDL-C 130-<160 mg/dL, 12.4% had LDL-C  $\geq 160$  mg/dL, 12.9% had LDL-C  $\geq 190$  mg/dL. Mean (SD) baseline HDL-C was 47.7 (13.0) mg/dL. After 12 weeks of evolocumab treatment, mean (SD) LDL-C was reduced by 57.6% (21.6) to 62.2% (44.1) mg/dL ( $p < 0.0001$ ; LDL-C reductions of 57.5% [23.2]/57.6% [21.6] in patients with/without FH and 46.0% [21.5]/58.5% [22.1] in primary/secondary prevention patients, respectively). At week 12, 64.9% patients reached LDL-C levels <70 mg/dL, and 49.1% <50 mg/dL, while statin use remained stable (data not shown). Only 3.2% ( $n=6$ ) patients discontinued evolocumab (voluntary withdrawal, mostly).

**Conclusions:** In Spanish Cardiology Units, evolocumab was typically prescribed in patients with FH and/or atherosclerotic cardiovascular disease, aligned with 2016 ESC/EAS guidelines recommendation on PCSK9i usage. Patients tended to have LDL-C levels above the recommended thresholds with LDL-C levels markedly reduced after 12 ( $\pm 4$ ) weeks of evolocumab treatment.

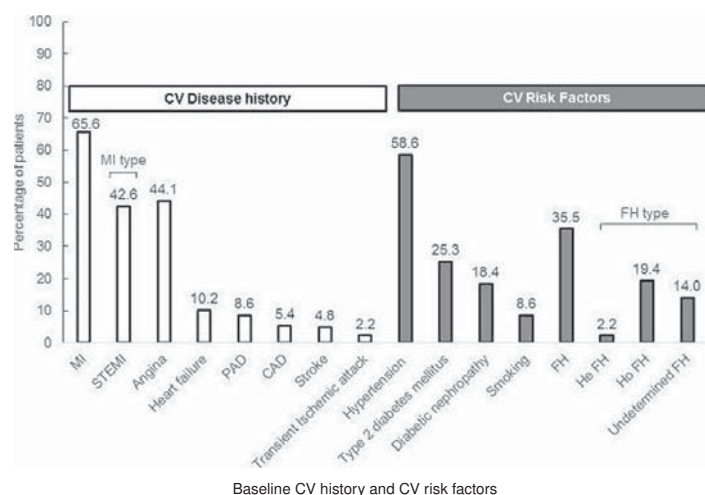

Baseline CV history and CV risk factors
